# Supplementary material
Source: PubMed Central journal article supplement (PMC2858251)
Supplement: NIHMS188125-supplement-Supp_Fig_1.pdf [file NIHMS188125-supplement-Supp_Fig_1.pdf]

Supplementary Material: Contact Prediction for Beta and Alpha-Beta  
Proteins Using Integer Linear Optimization and its Impact on the First  
Principles 3D Structure Prediction Method ASTRO-FOLD

R. Rajgaria, Y. Wei, and C. A. Floudas\*

Department of Chemical Engineering,

Princeton University,

Princeton, NJ 08544-5263, U.S.A.

December 12, 2009

---

\*Author to whom all correspondence should be addressed; Tel: +1-609-258-4595; Fax: +1-609-258-0211. *E-mail:*  
floudas@titan.princeton.edu

Table 1: Residue contact prediction results when tested on 8  $\beta$  proteins of test set 1.

|                |        | Residue Separation=6 |            |             | ResSep=12     | ResSep=24     |
|----------------|--------|----------------------|------------|-------------|---------------|---------------|
| PDB ID         | Length | Accuracy             | AvgTPdis   | AvgFPdis    | Accuracy      | Accuracy      |
| 1QJPA          | 137    | 0.810(111/137)       | 6.2        | 21.1        | 0.764(84/110) | 1.000(28/28)  |
| 1D2SA          | 170    | 0.606(77/127)        | 7.1        | 22.1        | 0.383(31/81)  | 0.344(22/64)  |
| 1CQYA          | 99     | 0.606(60/99)         | 7.2        | 15.9        | 0.663(59/89)  | 0.694(59/85)  |
| 1BMGA          | 98     | 0.510(50/98)         | 9.4        | 14.1        | 0.513(41/80)  | 0.640(32/50)  |
| 1MAL           | 119    | 0.328(39/119)        | 8.0        | 15.3        | 0.252(26/103) | 0.193(17/88)  |
| 1AMX           | 150    | 0.567(85/150)        | 7.7        | 17.1        | 0.568(75/132) | 0.558(72/129) |
| 1RSY           | 135    | 0.437(59/135)        | 8.6        | 16.3        | 0.437(59/135) | 0.567(55/97)  |
| 1HE7A          | 107    | 0.636(68/107)        | 7.7        | 13.5        | 0.682(60/88)  | 0.907(39/43)  |
| <b>Average</b> |        | <b>0.563</b>         | <b>7.7</b> | <b>16.9</b> | <b>0.532</b>  | <b>0.612</b>  |

Table 2: Residue contact prediction results when tested on 21  $\alpha + \beta$ , and  $\alpha/\beta$  proteins of test set 1.

|                |        | Residue Separation=6 |            |             | ResSep=12      | ResSep=24      |
|----------------|--------|----------------------|------------|-------------|----------------|----------------|
| PDB ID         | Length | Accuracy             | AvgTPdis   | AvgFPdis    | Accuracy       | Accuracy       |
| 1MWP           | 96     | 0.475 (38/80)        | 7.7        | 17.8        | 0.600 (27/45)  | 0.634 (26/41)  |
| 1QGV           | 130    | 0.737 (84/114)       | 7.2        | 14.8        | 0.737 (84/114) | 0.814 (79/97)  |
| 1DBU           | 152    | 0.517 (60/116)       | 8.0        | 17.2        | 0.514 (57/111) | 0.542 (45/83)  |
| 1XER           | 103    | 0.353 (18/51)        | 7.8        | 14.7        | 0.233 (10/43)  | 0.091 (2/22)   |
| 1JSF           | 130    | 0.667 (16/24)        | 7.8        | 17.7        | 0.462 (6/13)   | 0.167 (1/6)    |
| 1DZO           | 120    | 0.865 (64/74)        | 6.7        | 13.4        | 0.857 (48/56)  | NA (0/0)       |
| 1GRJ           | 76     | 0.672 (41/61)        | 7.1        | 13.6        | 0.689 (31/45)  | 0.654 (17/26)  |
| 1MSC           | 129    | 0.566 (73/129)       | 8.5        | 17.0        | 0.539 (62/115) | 0.523 (46/88)  |
| 1CEW           | 108    | 0.611 (66/108)       | 7.3        | 18.8        | 0.581 (50/86)  | 0.408 (20/49)  |
| 1VHH           | 157    | 0.424 (39/92)        | 7.6        | 16.7        | 0.329 (26/79)  | 0.246 (15/61)  |
| 1BUO           | 121    | 0.655 (36/55)        | 8.0        | 18.9        | 0.667 (24/36)  | 0.643 (18/28)  |
| 1G2R           | 94     | 0.763 (29/38)        | 7.5        | 14.1        | 0.720 (18/25)  | 1.000 (2/2)    |
| 1E9M           | 106    | 0.880 (44/50)        | 6.6        | 16.3        | 0.861 (31/36)  | 0.966 (28/29)  |
| 1E87           | 117    | 0.514 (55/107)       | 6.9        | 17.8        | 0.519 (55/106) | 0.524 (54/103) |
| 1H9O           | 108    | 0.500 (36/72)        | 7.6        | 16.0        | 0.632 (12/19)  | NA (0/0)       |
| 1IDO           | 184    | 0.529 (73/138)       | 8.4        | 15.1        | 0.512 (63/123) | 0.530 (61/115) |
| 1CHD           | 198    | 0.534 (79/148)       | 7.4        | 17.9        | 0.489 (66/135) | 0.402 (45/112) |
| 1FUE           | 163    | 0.551 (54/98)        | 7.6        | 16.8        | 0.552 (53/96)  | 0.552 (53/96)  |
| 1CXQ           | 143    | 0.711 (59/83)        | 7.0        | 15.2        | 0.619 (39/63)  | 0.211 (4/19)   |
| 1ES8           | 196    | 0.556 (80/144)       | 7.4        | 19.7        | 0.522 (60/115) | 0.653 (49/75)  |
| 1DMG           | 172    | 0.556 (65/117)       | 8.6        | 15.0        | 0.575 (65/113) | 0.619 (52/84)  |
| <b>Average</b> |        | <b>0.602</b>         | <b>7.6</b> | <b>16.4</b> | <b>0.581</b>   | <b>0.536</b>   |

Table 3: Residue contact prediction results when tested on 25  $\beta$  test proteins of test set 2.

|                |        | Residue Separation=6 |            |             | ResSep=8       | ResSep=12      | ResSep=24      |
|----------------|--------|----------------------|------------|-------------|----------------|----------------|----------------|
| PDB ID         | Length | Accuracy             | AvgTPdis   | AvgFPdis    | Accuracy       | Accuracy       | Accuracy       |
| 1PRR           | 90     | 0.602 (50/83)        | 7.3        | 14.8        | 0.602 (50/83)  | 0.568 (42/74)  | 0.605 (26/43)  |
| 3PCG           | 200    | 0.300 (45/150)       | 7.7        | 16.3        | 0.300 (45/150) | 0.297 (44/148) | 0.299 (44/147) |
| 1GOF           | 150    | 0.518 (73/141)       | 7.1        | 15.1        | 0.518 (73/141) | 0.514 (72/140) | 0.514 (72/140) |
| 1TSR           | 196    | 0.299 (44/147)       | 8.2        | 15.6        | 0.270 (38/141) | 0.233 (30/129) | 0.252 (27/107) |
| 1IS6           | 134    | 0.261 (35/134)       | 7.5        | 17.4        | 0.171 (19/111) | 0.073 (6/82)   | 0.000 (0/55)   |
| 1C5H           | 185    | 0.594 (82/138)       | 7.3        | 16.9        | 0.560 (70/125) | 0.505 (48/95)  | 0.553 (26/47)  |
| 1ESO           | 154    | 0.643 (74/115)       | 7.2        | 15.4        | 0.631 (70/111) | 0.606 (63/104) | 0.437 (31/71)  |
| 1F3Z           | 150    | 0.280 (42/150)       | 7.8        | 19.0        | 0.284 (40/141) | 0.308 (40/130) | 0.347 (35/101) |
| 1CDQ           | 77     | 0.919 (34/37)        | 6.9        | 13.6        | 0.903 (28/31)  | 0.857 (18/21)  | 0.813 (13/16)  |
| 1A5M           | 100    | 0.588 (30/51)        | 8.6        | 15.4        | 0.575 (23/40)  | 0.846 (11/13)  | NA (0/0)       |
| 1PDG           | 87     | 0.448 (39/87)        | 7.8        | 22.9        | 0.443 (35/79)  | 0.418 (28/67)  | 0.178 (8/45)   |
| 1IU0           | 91     | 0.442 (38/86)        | 7.5        | 15.9        | 0.442 (38/86)  | 0.493 (36/73)  | 0.418 (23/55)  |
| 2DYN           | 111    | 0.523 (58/111)       | 7.4        | 16.3        | 0.546 (53/97)  | 0.500 (39/78)  | 0.429 (18/42)  |
| 1AUU           | 55     | 1.000 (28/28)        | 6.4        | 0.0         | 1.000 (23/23)  | 1.000 (14/14)  | 1.000 (5/5)    |
| 1AN7           | 136    | 0.421 (56/133)       | 7.2        | 20.3        | 0.403 (48/119) | 0.359 (37/103) | 0.176 (13/74)  |
| 1BBZ           | 58     | 0.810 (47/58)        | 6.9        | 14.6        | 0.896 (43/48)  | 0.895 (34/38)  | 0.813 (13/16)  |
| 1A1R           | 152    | 0.693 (79/114)       | 7.3        | 15.4        | 0.632 (60/95)  | 0.517 (31/60)  | 0.385 (10/26)  |
| 1KDU           | 85     | 0.800 (16/20)        | 6.4        | 10.9        | 0.733 (11/15)  | 0.400 (2/5)    | 0.500 (1/2)    |
| 2SNS           | 141    | 0.653 (32/49)        | 8.9        | 13.2        | 0.653 (32/49)  | 0.543 (19/35)  | 0.515 (17/33)  |
| 1WHI           | 122    | 0.627(74/118)        | 8.5        | 13.3        | 0.627(74/118)  | 0.610(64/105)  | 0.521(37/71)   |
| 1OCA           | 165    | 0.537 (66/123)       | 7.5        | 15.9        | 0.509 (59/116) | 0.472 (51/108) | 0.325 (25/77)  |
| 6I1B           | 153    | 0.789 (90/114)       | 6.7        | 16.0        | 0.753 (73/97)  | 0.682 (45/66)  | 0.609 (14/23)  |
| 1JAC           | 133    | 0.398 (53/133)       | 7.4        | 15.9        | 0.376 (44/117) | 0.360 (27/75)  | 0.125 (4/32)   |
| 1JPC           | 108    | 0.861 (93/108)       | 7.1        | 14.3        | 0.838 (62/74)  | 0.636 (21/33)  | 0.538 (14/26)  |
| 1RIE           | 127    | 0.467 (56/120)       | 8.2        | 17.2        | 0.443 (51/115) | 0.429 (48/112) | 0.418 (46/110) |
| <b>Average</b> |        | <b>0.579</b>         | <b>7.5</b> | <b>15.3</b> | <b>0.564</b>   | <b>0.525</b>   | <b>0.449</b>   |

Table 4: Residue contact prediction results when tested on 29  $\alpha + \beta$ , and  $\alpha/\beta$  test proteins of test set 2.

|                |        | Residue Separation=6 |            |             | ResSep=8       | ResSep=12      | ResSep=24      |
|----------------|--------|----------------------|------------|-------------|----------------|----------------|----------------|
| PDB ID         | Length | Accuracy             | AvgTPdis   | AvgFPdis    | Accuracy       | Accuracy       | Accuracy       |
| 1FRD           | 98     | 0.490 (48/98)        | 7.6        | 16.3        | 0.495 (48/97)  | 0.493 (35/71)  | 0.500 (32/64)  |
| 1TIF           | 76     | 0.853 (58/68)        | 7.5        | 16.2        | 0.836 (51/61)  | 0.756 (31/41)  | 0.630 (17/27)  |
| 1B5M           | 84     | 0.842 (32/38)        | 7.6        | 10.3        | 0.818 (27/33)  | 0.833 (25/30)  | 0.833 (25/30)  |
| 1DMX           | 237    | 0.424 (75/177)       | 7.7        | 21.6        | 0.429 (70/163) | 0.424 (61/144) | 0.346 (44/127) |
| 1BP1           | 217    | 0.333 (54/162)       | 7.8        | 28.1        | 0.300 (45/150) | 0.275 (36/131) | 0.252 (27/107) |
| 1YDV           | 246    | 0.457 (63/138)       | 7.4        | 15.9        | 0.456 (62/136) | 0.456 (62/136) | 0.470 (62/132) |
| 1ONE           | 141    | 0.761 (51/67)        | 7.4        | 14.4        | 0.746 (44/59)  | 0.722 (26/36)  | NA (0/0)       |
| 1EAF           | 243    | 0.497 (87/175)       | 7.9        | 20.4        | 0.519 (83/160) | 0.560 (75/134) | 0.584 (66/113) |
| 1GLU           | 81     | 0.615 (8/13)         | 9.8        | 16.2        | 0.667 (8/12)   | 0.600 (6/10)   | 0.556 (5/9)    |
| 1BHP           | 45     | 0.947 (18/19)        | 7.6        | 12.3        | 0.941 (16/17)  | 1.000 (12/12)  | 1.000 (10/10)  |
| 1RIS           | 97     | 0.526 (51/97)        | 6.8        | 16.4        | 0.526 (51/97)  | 0.526 (51/97)  | 0.526 (51/97)  |
| 1MLA           | 70     | 0.943 (66/70)        | 6.6        | 11.3        | 0.938 (61/65)  | 0.927 (51/55)  | 0.957 (45/47)  |
| 1DBD           | 100    | 0.962 (51/53)        | 6.4        | 19.7        | 0.962 (51/53)  | 0.962 (51/53)  | 1.000 (51/51)  |
| 1F5M           | 176    | 0.591 (78/132)       | 6.6        | 15.8        | 0.583 (74/127) | 0.541 (60/111) | 0.420 (34/81)  |
| 1APY           | 161    | 0.880 (44/50)        | 7.3        | 19.2        | 0.870 (40/46)  | 0.882 (30/34)  | 0.727 (8/11)   |
| 1QNX           | 209    | 0.327 (51/156)       | 9.3        | 18.4        | 0.327 (51/156) | 0.333 (43/129) | 0.343 (37/108) |
| 1JUL           | 247    | 0.261 (37/142)       | 8.1        | 16.0        | 0.250 (35/140) | 0.246 (34/138) | 0.252 (34/135) |
| 2HGF           | 97     | 0.926 (50/54)        | 6.7        | 10.1        | 0.918 (45/49)  | 0.900 (36/40)  | 0.892 (33/37)  |
| 1DIV           | 55     | 1.000 (24/24)        | 6.6        | 0.0         | 1.000 (24/24)  | 1.000 (23/23)  | 1.000 (11/11)  |
| 1BLE           | 161    | 0.533 (64/120)       | 7.9        | 18.0        | 0.533 (64/120) | 0.533 (64/120) | 0.536 (59/110) |
| 1IOW           | 96     | 0.886 (39/44)        | 7.0        | 14.5        | 0.886 (39/44)  | 0.949 (37/39)  | 0.974 (37/38)  |
| 2PIA           | 103    | 0.584 (59/101)       | 8.0        | 15.3        | 0.577 (56/97)  | 0.568 (46/81)  | 0.565 (35/62)  |
| 2SCU           | 121    | 0.604 (58/96)        | 7.8        | 16.7        | 0.604 (58/96)  | 0.600 (57/95)  | 0.500 (26/52)  |
| 1LFA           | 183    | 0.574 (78/136)       | 7.6        | 18.8        | 0.574 (78/136) | 0.578 (78/135) | 0.486 (53/109) |
| 1A1S           | 150    | 0.512 (42/82)        | 9.1        | 14.4        | 0.512 (42/82)  | 0.512 (42/82)  | 0.522 (35/67)  |
| 1O7B           | 98     | 0.623 (33/53)        | 6.7        | 14.8        | 0.635 (33/52)  | 0.673 (33/49)  | 0.594 (19/32)  |
| 1DEF           | 147    | 0.576 (38/66)        | 7.2        | 14.8        | 0.691 (38/55)  | 0.644 (29/45)  | 0.568 (21/37)  |
| 1MLD           | 144    | 0.640 (73/114)       | 8.9        | 13.5        | 0.640 (73/114) | 0.637 (72/113) | 0.625 (60/96)  |
| 1FIB           | 249    | 0.505 (94/186)       | 7.6        | 17.6        | 0.497 (91/183) | 0.463 (74/160) | 0.253 (24/95)  |
| <b>Average</b> |        | <b>0.643</b>         | <b>7.6</b> | <b>15.8</b> | <b>0.646</b>   | <b>0.641</b>   | <b>0.604</b>   |

Table 5: Residue contact prediction results when tested on 29  $\alpha + \beta$ , and  $\alpha/\beta$  test proteins of test set 2 with secondary structure information derived using PSIPRED.

|                |        | Residue Separation=6 |            |             | ResSep=8        | ResSep=12       | ResSep=24      |
|----------------|--------|----------------------|------------|-------------|-----------------|-----------------|----------------|
| PDB ID         | Length | Accuracy             | AvgTPdis   | AvgFPdis    | Accuracy        | Accuracy        | Accuracy       |
| 1FRD           | 98     | 0.488 (40/82)        | 7.3        | 16.3        | 0.488 (39/80)   | 0.460 (29/63)   | 0.423 (22/52)  |
| 1TIF           | 76     | 0.903 (28/31)        | 8.4        | 12.1        | 0.903 (28/31)   | 0.833 (15/18)   | 0.800 (12/15)  |
| 1B5M           | 84     | 0.830 (39/47)        | 7.6        | 12.8        | 0.810 (34/42)   | 0.788 (26/33)   | 0.788 (26/33)  |
| 1DMX           | 237    | 0.537 (95/177)       | 8.3        | 19.8        | 0.541 (92/170)  | 0.525 (85/162)  | 0.511 (71/139) |
| 1BP1           | 217    | 0.333 (54/162)       | 9.3        | 40.1        | 0.325 (52/160)  | 0.307 (46/150)  | 0.287 (41/143) |
| 1YDV           | 246    | 0.426 (60/141)       | 8.7        | 15.1        | 0.429 (60/140)  | 0.429 (60/140)  | 0.361 (44/122) |
| 1ONE           | 141    | 0.511 (45/88)        | 9.2        | 17.4        | 0.488 (40/82)   | 0.491 (27/55)   | 0.565 (13/23)  |
| 1EAF           | 243    | 0.302 (55/182)       | 8.6        | 26.6        | 0.269 (45/167)  | 0.257 (38/148)  | 0.295 (38/129) |
| 1GLU           | 81     | 0.563 (18/32)        | 8.1        | 21.0        | 0.548 (17/31)   | 0.517 (15/29)   | 0.500 (5/10)   |
| 1BHP           | 45     | 0.769 (10/13)        | 8.5        | 14.1        | 0.727 (8/11)    | 0.750 (3/4)     | NA (0/0)       |
| 1RIS           | 97     | 0.567 (55/97)        | 7.9        | 14.6        | 0.567 (55/97)   | 0.567 (55/97)   | 0.587 (54/92)  |
| 1MLA           | 70     | 0.613 (38/62)        | 7.7        | 13.8        | 0.607 (37/61)   | 0.585 (31/53)   | 0.686 (24/35)  |
| 1DBD           | 100    | 0.650 (65/100)       | 7.9        | 16.9        | 0.684 (65/95)   | 0.707 (65/92)   | 0.846 (55/65)  |
| 1F5M           | 176    | 0.538 (71/132)       | 8.4        | 16.8        | 0.528 (67/127)  | 0.483 (56/116)  | 0.422 (38/90)  |
| 1APY           | 161    | 0.579 (44/76)        | 7.9        | 20.3        | 0.563 (40/71)   | 0.500 (28/56)   | 0.265 (9/34)   |
| 1QNX           | 209    | 0.568 (50/88)        | 7.8        | 15.2        | 0.548 (46/84)   | 0.541 (40/74)   | 0.491 (27/55)  |
| 1JUL           | 247    | 0.570 (90/158)       | 8.2        | 15.1        | 0.570 (90/158)  | 0.577 (90/156)  | 0.622 (89/143) |
| 2HGF           | 97     | 0.754 (49/65)        | 7.7        | 13.7        | 0.738 (45/61)   | 0.756 (31/41)   | 0.744 (29/39)  |
| 1DIV           | 55     | 0.875 (14/16)        | 7.0        | 12.3        | 0.875 (14/16)   | 0.867 (13/15)   | NA (0/0)       |
| 1BLE           | 161    | 0.542 (65/120)       | 8.2        | 16.1        | 0.542 (65/120)  | 0.565 (65/115)  | 0.616 (61/99)  |
| 1HOW           | 96     | 0.830 (39/47)        | 7.8        | 13.6        | 0.830 (39/47)   | 0.830 (39/47)   | 0.826 (38/46)  |
| 2PIA           | 103    | 0.631 (65/103)       | 7.4        | 16.2        | 0.616 (61/99)   | 0.624 (53/85)   | 0.698 (44/63)  |
| 2SCU           | 121    | 0.423 (47/111)       | 9.0        | 16.6        | 0.423 (47/111)  | 0.423 (47/111)  | 0.429 (45/105) |
| 1LFA           | 183    | 0.832 (114/137)      | 6.9        | 16.3        | 0.827 (110/133) | 0.816 (102/125) | 0.848 (84/99)  |
| 1A1S           | 150    | 0.789 (60/76)        | 6.7        | 17.0        | 0.789 (60/76)   | 0.789 (60/76)   | 0.769 (40/52)  |
| 1O7B           | 98     | 0.493 (36/73)        | 6.9        | 15.5        | 0.500 (36/72)   | 0.522 (35/67)   | 0.536 (15/28)  |
| 1DEF           | 147    | 0.422 (62/147)       | 8.1        | 18.3        | 0.439 (61/139)  | 0.408 (53/130)  | 0.350 (41/117) |
| 1MLD           | 144    | 0.671 (55/82)        | 7.9        | 15.1        | 0.671 (55/82)   | 0.667 (54/81)   | 0.667 (50/75)  |
| 1FIB           | 249    | 0.522 (97/186)       | 8.0        | 16.1        | 0.519 (95/183)  | 0.488 (78/160)  | 0.446 (58/130) |
| <b>Average</b> |        | <b>0.605</b>         | <b>7.9</b> | <b>17.0</b> | <b>0.599</b>    | <b>0.589</b>    | <b>0.570</b>   |

Table 6: Residue contact prediction results when tested on 100  $\beta$  and mixed  $\alpha/\beta$  proteins of test set 3.

|        |        | Residue Separation=6 |          |          | ResSep=12     | ResSep=24     |
|--------|--------|----------------------|----------|----------|---------------|---------------|
| PDB ID | Length | Accuracy             | AvgTPdis | AvgFPdis | Accuracy      | Accuracy      |
| 1QLD   | 50     | 0.833 (20/24)        | 7.1      | 12.1     | 0.733 (11/15) | 1.000 (1/1)   |
| 1Z0R   | 53     | 1.000 (15/15)        | 6.2      | NA       | 1.000 (1/1)   | NA (0/0)      |
| 1S0Y   | 55     | 0.552 (16/29)        | 7.5      | 15.3     | 0.552 (16/29) | 0.552 (16/29) |
| 1P65   | 57     | 0.875 (14/16)        | 7.6      | 14.8     | 0.750 (3/4)   | 1.000 (3/3)   |
| 1CXW   | 60     | 0.786 (22/28)        | 6.5      | 12.8     | 0.739 (17/23) | 1.000 (1/1)   |
| 1HX2   | 60     | 0.810 (17/21)        | 5.9      | 13.3     | 0.813 (13/16) | 0.857 (12/14) |
| 1DTD   | 61     | 0.754 (46/61)        | 8.5      | 13.2     | 0.681 (32/47) | 0.634 (26/41) |
| 1HZ6   | 63     | 0.556 (35/63)        | 7.6      | 15.7     | 0.500 (19/38) | 0.593 (16/27) |
| 2FQM   | 64     | 0.621 (18/29)        | 6.3      | 22.5     | 0.000 (0/11)  | 0.000 (0/11)  |
| 2A50   | 64     | 0.557 (34/61)        | 7.8      | 14.4     | 0.548 (17/31) | 1.000 (2/2)   |
| 1F02   | 66     | 0.727 (16/22)        | 8.6      | 13.2     | 0.900 (9/10)  | 1.000 (4/4)   |
| 1UW1   | 67     | 0.966 (28/29)        | 6.2      | 11.3     | 1.000 (21/21) | 1.000 (11/11) |
| 1VBW   | 68     | 0.667 (16/24)        | 7.0      | 12.9     | 0.667 (16/24) | 1.000 (1/1)   |
| 4ULL   | 69     | 0.744 (32/43)        | 6.3      | 12.5     | 0.737 (28/38) | 0.929 (13/14) |
| 1BB8   | 71     | 0.667 (16/24)        | 7.7      | 14.2     | 0.750 (3/4)   | NA (0/0)      |
| 1KN6   | 73     | 0.966 (28/29)        | 6.9      | 3.9      | 0.966 (28/29) | 0.966 (28/29) |
| 1I27   | 73     | 1.000 (10/10)        | 6.4      | NA       | NA (0/0)      | NA (0/0)      |
| 1OK0   | 74     | 0.541 (40/74)        | 8.8      | 14.1     | 0.529 (36/68) | 0.667 (26/39) |
| 1TH5   | 74     | 0.818 (18/22)        | 7.5      | 13.4     | 0.800 (16/20) | 0.800 (16/20) |
| 1HLQ   | 75     | 1.000 (2/2)          | 8.8      | NA       | 1.000 (2/2)   | 1.000 (1/1)   |
| 1LJO   | 75     | 0.760 (57/75)        | 7.3      | 14.2     | 0.691 (38/55) | 0.444 (12/27) |
| 1KVD   | 77     | 0.531 (34/64)        | 8.7      | 13.9     | 0.531 (34/64) | 0.531 (34/64) |
| 1KP6   | 79     | 0.613 (38/62)        | 8.9      | 14.7     | 0.607 (37/61) | 0.684 (26/38) |
| 1ZT3   | 80     | 0.714 (10/14)        | 6.3      | 14.4     | 0.636 (7/11)  | 0.000 (0/3)   |
| 1XS3   | 80     | 0.794 (27/34)        | 7.7      | 12.4     | 0.794 (27/34) | 0.708 (17/24) |
| 1IS7   | 84     | 0.845 (71/84)        | 7.1      | 13.4     | 0.814 (57/70) | 0.794 (50/63) |
| 1F53   | 84     | 0.651 (41/63)        | 8.0      | 13.3     | 0.553 (21/38) | 0.214 (3/14)  |
| 2A6S   | 84     | 0.934 (57/61)        | 7.3      | 13.6     | 0.840 (21/25) | 0.778 (14/18) |
| 1E44   | 84     | 0.869 (73/84)        | 7.0      | 16.2     | 0.941 (64/68) | 1.000 (50/50) |
| 1Y96   | 85     | 0.624 (53/85)        | 7.2      | 14.0     | 0.630 (29/46) | 0.500 (6/12)  |
| 1OPD   | 85     | 0.655 (36/55)        | 7.7      | 14.8     | 0.655 (36/55) | 0.655 (36/55) |
| 1X9A   | 87     | 0.712 (37/52)        | 7.8      | 12.4     | 0.712 (37/52) | 0.545 (12/22) |
| 1GH8   | 89     | 0.976 (80/82)        | 6.6      | 16.4     | 0.976 (80/82) | 0.976 (80/82) |

Continued..

Table 7: Residue contact prediction results when tested on 100  $\beta$  and mixed  $\alpha/\beta$  proteins of test set 3.

| PDB ID | Length | Residue Separation=6 |          |          | ResSep=12     | ResSep=24     |
|--------|--------|----------------------|----------|----------|---------------|---------------|
|        |        | Accuracy             | AvgTPdis | AvgFPdis | Accuracy      | Accuracy      |
| 1U07   | 90     | 0.452 (38/84)        | 8.2      | 15.5     | 0.452 (38/84) | 0.535 (38/71) |
| 1F60   | 90     | 0.911 (82/90)        | 7.1      | 12.5     | 0.900 (72/80) | 0.867 (52/60) |
| 1XEE   | 91     | 0.653 (47/72)        | 7.0      | 15.4     | 0.565 (26/46) | 0.441 (15/34) |
| 1FUW   | 91     | 0.857 (42/49)        | 6.6      | 11.6     | 0.813 (26/32) | 1.000 (1/1)   |
| 1T23   | 93     | 0.548 (51/93)        | 7.5      | 16.2     | 0.437 (31/71) | 0.311 (14/45) |
| 2A8K   | 94     | 0.767 (46/60)        | 8.5      | 12.2     | 0.711 (32/45) | 0.815 (22/27) |
| 1PYT   | 94     | 0.694 (50/72)        | 8.6      | 19.3     | 0.694 (50/72) | 0.791 (34/43) |
| 1IM3   | 95     | 0.558 (53/95)        | 6.8      | 14.2     | 0.425 (31/73) | 0.030 (1/33)  |
| 1J00   | 96     | 0.741 (43/58)        | 7.2      | 14.1     | 0.727 (32/44) | 0.886 (31/35) |
| 2HGF   | 97     | 0.926 (50/54)        | 6.7      | 10.1     | 0.900 (36/40) | 0.892 (33/37) |
| 1OVY   | 97     | 0.636 (28/44)        | 7.9      | 14.1     | 0.571 (8/14)  | 1.000 (2/2)   |
| 1PRT   | 98     | 0.592 (58/98)        | 7.3      | 13.8     | 0.529 (37/70) | 0.200 (5/25)  |
| 1LM0   | 101    | 0.683 (69/101)       | 7.3      | 13.1     | 0.579 (44/76) | 0.429 (24/56) |
| 1ZDX   | 101    | 0.813 (78/96)        | 7.3      | 12.9     | 0.778 (63/81) | 0.717 (43/60) |
| 3EZM   | 101    | 0.406 (41/101)       | 6.5      | 24.5     | 0.161 (9/56)  | 0.000 (0/37)  |
| 1GO1   | 102    | 0.783 (54/69)        | 7.1      | 21.0     | 0.783 (54/69) | 0.907 (49/54) |
| 1JT8   | 102    | 0.696 (71/102)       | 8.5      | 15.6     | 0.644 (56/87) | 0.631 (53/84) |
| 1Z5F   | 104    | 0.489 (44/90)        | 8.1      | 16.3     | 0.375 (27/72) | 0.419 (13/31) |
| 1N6Z   | 105    | 0.698 (67/96)        | 7.5      | 15.9     | 0.708 (51/72) | 0.708 (51/72) |
| 1EW4   | 106    | 0.651 (69/106)       | 8.0      | 15.5     | 0.493 (33/67) | 0.143 (2/14)  |
| 1KAF   | 108    | 0.731 (79/108)       | 7.8      | 14.9     | 0.629 (44/70) | 0.636 (21/33) |
| 1YH5   | 108    | 0.686 (35/51)        | 8.3      | 13.6     | 0.594 (19/32) | 0.478 (11/23) |
| 2D0P   | 110    | 0.620 (57/92)        | 8.0      | 14.2     | 0.581 (43/74) | 0.688 (33/48) |
| 2BHO   | 110    | 0.536 (59/110)       | 7.5      | 15.4     | 0.444 (24/54) | 0.447 (21/47) |
| 1WWQ   | 111    | 0.781 (50/64)        | 7.3      | 13.2     | 0.702 (33/47) | 0.667 (14/21) |
| 1D4U   | 111    | 0.923 (12/13)        | 6.5      | 26.6     | 0.909 (10/11) | NA (0/0)      |
| 1NYC   | 111    | 0.820 (91/111)       | 6.7      | 14.3     | 0.775 (69/89) | 0.661 (39/59) |
| 1O5P   | 113    | 0.372 (42/113)       | 8.0      | 16.1     | 0.370 (34/92) | 0.430 (34/79) |
| 1N3G   | 113    | 0.470 (39/83)        | 8.7      | 16.2     | 0.500 (22/44) | 1.000 (11/11) |
| 1WHG   | 113    | 0.593 (54/91)        | 8.2      | 14.6     | 0.600 (48/80) | 0.627 (37/59) |
| 1F86   | 115    | 0.791 (91/115)       | 6.7      | 13.5     | 0.745 (70/94) | 0.586 (34/58) |
| 2B7F   | 116    | 0.595 (66/111)       | 8.0      | 15.2     | 0.564 (53/94) | 0.547 (29/53) |
| 1WN2   | 118    | 0.541 (53/98)        | 8.5      | 14.1     | 0.526 (50/95) | 0.516 (47/91) |

Continued..



Table 8: Residue contact prediction results when tested on 100  $\beta$  and mixed  $\alpha/\beta$  proteins of test set 3.

|                |        | Residue Separation=6 |              |             | ResSep=12      | ResSep=24      |
|----------------|--------|----------------------|--------------|-------------|----------------|----------------|
| PDB ID         | Length | Accuracy             | AvgTPdis     | AvgFPdis    | Accuracy       | Accuracy       |
| 1K3B           | 119    | 0.429 (51/119)       | 7.1          | 18.4        | 0.319 (23/72)  | 0.294 (10/34)  |
| 1SSF           | 123    | 0.439 (54/123)       | 7.4          | 16.8        | 0.341 (31/91)  | 0.319 (22/69)  |
| 1MAE           | 124    | 0.395 (34/86)        | 7.6          | 17.7        | 0.481 (25/52)  | 0.429 (18/42)  |
| 1HKQ           | 125    | 0.656 (61/93)        | 7.3          | 20.3        | 0.795 (31/39)  | 0.742 (23/31)  |
| 1SZV           | 125    | 0.563 (63/112)       | 7.3          | 15.6        | 0.474 (36/76)  | 0.395 (15/38)  |
| 1EIO           | 127    | 0.622 (79/127)       | 7.3          | 15.4        | 0.606 (40/66)  | 0.621 (18/29)  |
| 1A63           | 130    | 0.625 (40/64)        | 7.9          | 13.7        | 0.613 (38/62)  | 0.545 (12/22)  |
| 1Z1D           | 131    | 0.439 (54/123)       | 7.9          | 17.1        | 0.355 (38/107) | 0.354 (29/82)  |
| 1C7K           | 132    | 0.617 (58/94)        | 7.7          | 16.0        | 0.614 (51/83)  | 0.431 (22/51)  |
| 1TQZ           | 133    | 0.451 (51/113)       | 7.0          | 16.7        | 0.400 (32/80)  | 0.228 (13/57)  |
| 1IS3           | 134    | 0.261 (35/134)       | 7.5          | 17.5        | 0.073 (6/82)   | 0.000 (0/55)   |
| 1QYN           | 136    | 0.647 (88/136)       | 7.3          | 22.6        | 0.584 (66/113) | 0.444 (32/72)  |
| 1CL3           | 138    | 0.669 (81/121)       | 7.8          | 15.1        | 0.622 (56/90)  | 0.476 (38/66)  |
| 1WKI           | 141    | 0.694 (43/62)        | 7.5          | 17.2        | 0.694 (43/62)  | 0.694 (43/62)  |
| 1KTU           | 143    | 0.410 (32/78)        | 7.2          | 14.5        | 0.188 (9/48)   | 0.000 (0/24)   |
| 1W4S           | 146    | 0.541 (79/146)       | 6.9          | 17.0        | 0.484 (59/122) | 0.159 (11/69)  |
| 1IDP           | 147    | 0.483 (71/147)       | 7.8          | 15.4        | 0.400 (50/125) | 0.253 (24/95)  |
| 1JL1           | 152    | 0.605 (69/114)       | 7.0          | 17.0        | 0.660 (66/100) | 1.000 (45/45)  |
| 1HQK           | 154    | 0.514 (55/107)       | 7.7          | 17.9        | 0.514 (55/107) | 0.519 (55/106) |
| 1P6O           | 156    | 0.586 (65/111)       | 8.1          | 16.6        | 0.575 (61/106) | 0.564 (44/78)  |
| 1ZWT           | 158    | 0.977 (42/43)        | 7.3          | 11.6        | 0.971 (34/35)  | 0.968 (30/31)  |
| 1AX3           | 162    | 0.240 (29/121)       | 7.7          | 17.0        | 0.278 (25/90)  | 0.284 (25/88)  |
| 1SK3           | 165    | 0.632 (72/114)       | 7.5          | 18.2        | 0.604 (64/106) | 0.610 (64/105) |
| 1XPB           | 170    | 0.740 (94/127)       | 7.5          | 11.9        | 0.778 (77/99)  | 0.815 (53/65)  |
| 1OQV           | 171    | 0.513 (60/117)       | 7.2          | 17.2        | 0.513 (60/117) | 0.588 (47/80)  |
| 1CV8           | 173    | 0.271 (35/129)       | 9.0          | 16.5        | 0.256 (31/121) | 0.248 (26/105) |
| 1C5F           | 173    | 0.550 (71/129)       | 6.8          | 16.7        | 0.487 (55/113) | 0.345 (29/84)  |
| 1OH4           | 174    | 0.292 (38/130)       | 8.6          | 18.4        | 0.269 (29/108) | 0.305 (29/95)  |
| 1I40           | 175    | 0.374 (49/131)       | 8.8          | 19.3        | 0.374 (49/131) | 0.300 (30/100) |
| 1BNL           | 178    | 0.625 (45/72)        | 7.5          | 17.3        | 0.625 (45/72)  | 0.672 (45/67)  |
| 1UCD           | 190    | 0.401 (57/142)       | 8.7          | 18.6        | 0.416 (57/137) | 0.414 (55/133) |
| 2CAR           | 194    | 0.497 (72/145)       | 6.8          | 21.5        | 0.478 (65/136) | 0.348 (31/89)  |
| 1K4I           | 216    | 0.358 (43/120)       | 7.8          | 19.9        | 0.321 (36/112) | 0.277 (28/101) |
| 2BO9           | 217    | 0.660 (107/162)      | 8.4          | 14.6        | 0.635 (87/137) | 0.544 (43/79)  |
| <b>Average</b> |        | <b>0.646</b>         | <b>7.5 g</b> | <b>15.0</b> | <b>0.603</b>   | <b>0.675</b>   |

Table 9: Residue contact prediction results for 20 selected CASP8 proteins.

| PDB ID         | Length | Residue Separation=6 |            |             | ResSep=8       | ResSep=12      | ResSep=24     |
|----------------|--------|----------------------|------------|-------------|----------------|----------------|---------------|
|                |        | Accuracy             | AvgTPdis   | AvgFPdis    | Accuracy       | Accuracy       | Accuracy      |
| t389           | 134    | 0.607 (37/61)        | 7.2        | 19.4        | 0.600 (36/60)  | 0.596 (34/57)  | 0.733 (33/45) |
| t399           | 162    | 0.603 (73/121)       | 6.8        | 17.8        | 0.577 (60/104) | 0.566 (43/76)  | 0.000 (0/32)  |
| t401           | 132    | 0.378 (34/90)        | 7.3        | 15.7        | 0.382 (34/89)  | 0.254 (16/63)  | 0.078 (4/51)  |
| t411           | 120    | 0.769 (30/39)        | 7.2        | 18.1        | 0.763 (29/38)  | 0.763 (29/38)  | 0.857 (24/28) |
| t415           | 109    | 0.491 (53/108)       | 6.9        | 18.4        | 0.487 (38/78)  | 0.310 (13/42)  | 0.216 (8/37)  |
| t417           | 159    | 0.580 (69/119)       | 7.6        | 16.6        | 0.569 (66/116) | 0.533 (57/107) | 0.453 (39/86) |
| t425           | 181    | 0.430 (52/121)       | 8.1        | 15.5        | 0.415 (49/118) | 0.436 (48/110) | 0.488 (41/84) |
| t437           | 99     | 0.175 (17/97)        | 7.0        | 20.4        | 0.140 (13/93)  | 0.079 (5/63)   | 0.044 (2/45)  |
| t451           | 133    | 0.576 (76/132)       | 7.9        | 17.3        | 0.598 (70/117) | 0.612 (60/98)  | 0.429 (27/63) |
| t460           | 111    | 0.836 (51/61)        | 7.4        | 13.0        | 0.815 (44/54)  | 0.800 (36/45)  | 0.750 (21/28) |
| t466           | 108    | 0.250 (27/108)       | 7.7        | 18.1        | 0.247 (22/89)  | 0.227 (15/66)  | 0.375 (9/24)  |
| t468           | 109    | 0.443 (39/88)        | 7.1        | 16.6        | 0.443 (39/88)  | 0.443 (39/88)  | 0.414 (24/58) |
| t469           | 65     | 0.900 (9/10)         | 9.9        | 12.4        | 0.900 (9/10)   | 0.900 (9/10)   | 0.900 (9/10)  |
| t471           | 133    | 0.373 (47/126)       | 7.3        | 16.7        | 0.342 (41/120) | 0.225 (23/102) | 0.111 (8/72)  |
| t474           | 80     | 0.833 (5/6)          | 9.8        | 14.5        | 0.833 (5/6)    | 1.000 (2/2)    | NA (0/0)      |
| t476           | 87     | 0.167 (3/18)         | 9.6        | 18.7        | 0.167 (3/18)   | 0.167 (3/18)   | 0.167 (3/18)  |
| t480           | 55     | 0.152 (7/46)         | 9.4        | 19.1        | 0.189 (7/37)   | 0.214 (6/28)   | NA (0/0)      |
| t482           | 120    | 0.507 (38/75)        | 7.2        | 16.5        | 0.507 (38/75)  | 0.486 (35/72)  | 0.176 (3/17)  |
| t492           | 73     | 0.575 (42/73)        | 7.3        | 15.2        | 0.551 (38/69)  | 0.481 (26/54)  | 0.516 (16/31) |
| t495           | 146    | 0.707 (87/123)       | 7.9        | 15.0        | 0.681 (77/113) | 0.622 (51/82)  | 0.294 (5/17)  |
| <b>Average</b> |        | <b>0.518</b>         | <b>7.8</b> | <b>16.8</b> | <b>0.510</b>   | <b>0.486</b>   | <b>0.389</b>  |

Table 10: A comparison of RMSD, TM score and GDT score distributions for predicted tertiary structures of proteins generated 1) using predicted residue contacts and 2) without using predicted contacts.

| <b>Proteins</b> | With Predicted Contacts |           |           | Without Predicted Contacts |           |           |
|-----------------|-------------------------|-----------|-----------|----------------------------|-----------|-----------|
|                 | RMSD range              | TM range  | GDT range | RMSD range                 | TM range  | GDT range |
| 1J75            | 2.98-12.15              | 0.24-0.57 | 0.33-0.67 | 5.06-22.56                 | 0.24-0.52 | 0.30-0.61 |
| 1CTJ            | 5.26-17.76              | 0.21-0.44 | 0.23-0.45 | 7.99-33.05                 | 0.20-0.40 | 0.22-0.40 |
| 1ELR            | 4.59-18.12              | 0.20-0.57 | 0.20-0.49 | 8.63-33.45                 | 0.16-0.41 | 0.17-0.36 |
| 1R69            | 3.74-12.55              | 0.21-0.49 | 0.28-0.56 | 4.58-22.32                 | 0.20-0.44 | 0.25-0.54 |
| 1AUU            | 4.31-15.33              | 0.18-0.48 | 0.24-0.59 | 6.93-42.28                 | 0.11-0.31 | 0.16-0.38 |
| T499            | 5.20-11.73              | 0.22-0.39 | 0.29-0.54 | 6.58-30.58                 | 0.22-0.38 | 0.27-0.46 |
| T473            | 5.01-12.44              | 0.23-0.42 | 0.30-0.54 | 5.90-27.87                 | 0.22-0.40 | 0.26-0.47 |
| 1C75            | 5.11-13.38              | 0.20-0.41 | 0.23-0.47 | 5.91-26.45                 | 0.19-0.39 | 0.22-0.44 |
| 1HCR            | 4.05-15.20              | 0.22-0.62 | 0.29-0.70 | 4.83-18.55                 | 0.21-0.49 | 0.28-0.59 |
| 1ROP            | 0.99-6.53               | 0.33-0.90 | 0.49-0.96 | 1.34-23.96                 | 0.37-0.85 | 0.46-0.93 |

Table 11: A comparison of the numbers of the meaningful structures of proteins generated 1) using predicted residue contacts and 2) without using predicted contacts.

| <b>Proteins</b> | <b>With Predicted Contacts</b> |          |           | <b>Without Predicted Contacts</b> |          |           |
|-----------------|--------------------------------|----------|-----------|-----------------------------------|----------|-----------|
|                 | RMSD < 6Å                      | TM > 0.4 | GDT > 0.4 | RMSD < 6Å                         | TM > 0.4 | GDT > 0.4 |
| 1J75            | 14262                          | 5999     | 25361     | 383                               | 18       | 13742     |
| 1CTJ            | 10                             | 30       | 103       | 0                                 | 0        | 0         |
| 1ELR            | 10                             | 359      | 132       | 0                                 | 1        | 0         |
| 1R69            | 2520                           | 280      | 7268      | 264                               | 26       | 1946      |
| 1AUU            | 497                            | 700      | 7980      | 0                                 | 0        | 0         |
| T499            | 244                            | 0        | 3194      | 0                                 | 0        | 2077      |
| T473            | 108                            | 11       | 4060      | 1                                 | 2        | 266       |
| 1C75            | 8                              | 1        | 313       | 4                                 | 0        | 134       |
| 1HCR            | 418                            | 2458     | 19390     | 102                               | 206      | 11967     |
| 1ROP            | 32409                          | 32290    | 32481     | 31144                             | 35042    | 35108     |
